# Supplementary material
Source: Springer Nature journal article supplement (https://www.springermedizin.de/resource/supplementary/12883_2013_1146_MOESM2_ESM.pdf/9456548)
Supplement: MOESM2 [file 9456548]

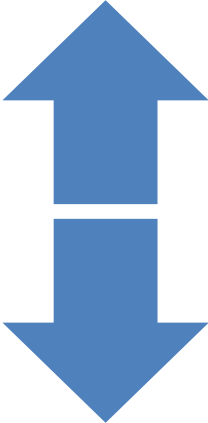

**Facilitators to Self-Management:**

- Physical support from the caregiver
- Emotional support from the caregiver
- Peer support and feedback
- Importance of positive outlook and acceptance
- Maintaining independence/control over care

**Barriers to Self-Management:**

- Caregiver burnout
- Funding and funding policies
- Lack of accessibility
- Physical limitations and secondary complications
- Difficulties achieving positive outlook or mood
